# Supplementary material
Source: ML conference proceedings conference paper supplement (https://openreview.net/forum?id=v4AT18kysa)
Supplement: supplementary_material [file raw_experiment_result.xlsx]

## Sheet: main
			COVOST2										Fluers
			zh-en	de-en	es-en	fr-en	it-en	en-zh	en-de	X-EN	EN-X		X2EN	EN2X	X2X
Offline	Whisper small	original	3.4	24.4	32.5	26.4	25.4	\	\	22.4	\		\	\	\
		finetune	20.9	27.9	35.1	30.7	29.7	30.8	25.3	28.9	28		19.9	24.9	17.8
	Whisper medium	original	10.3	32.8	38.7	33.8	33.4	\	\	29.8	\		\	\	\
		finetune	25.9	34.9	40.7	37.6	36.2	41	32.2	35.1	36.6		25	30.3	22.9
	Whisper Large	original	12.23	35.33	40.25	35.79	36.43	\	\	32.006	\
	Seamless	medium	18.3	35.4	40.5	39.9	38	38.4	33.3	34.4	35.9		25.6	27.1	16.1
		large-v2	22	40.9	44.5	43	41	43.2	38.5	38.3	40.8		29.8	31.5	19.6
		streaming	21.29	36.25	40.49	39.7	38.82	40.2	34.92	35.31	37.56
	ours	offline	27	37.4	41.5	40.1	38.9	44.1	33.6	37	38.9		26.4	32.4	25.1
		simul	26.9	37.3	41.3	40	38.9	43.6	33.5	36.9	38.5		26.5	31.4	24.4
Simul BLEU	Seamless Streaming	1	20.9	36.2	40	39.8	38.4	38.6	32.3	35.1	35.4		27.2	28.9	17.9		8.35509	13.2353
		0.9	20.2	35.39	39.32	39.1	37.75	37.91	30.52	34.352	34.215						10.3081	16.1397
		0.7	20.13	35.35	39	38.55	37.38	37.54	30.14	34.082	33.84						11.0131	17.0588
		0.5	19.8	35.3	38.8	38.1	36.9	37.3	30.2	33.8	33.7		25.8	28.6	17.4		11.7493	17.402
		0.3	19.5	35.1	38.7	37.7	36.7	37.3	29.4	33.5	33.3		25.4	28.4	17.2		12.5326	18.3824
	DigSST	0.01	26.27	36.81	41.12	39.64	38.79	21.16	25.45	36.526	23.305
		0.03	25.63	36.27	40.52	39.35	38.2	15.89	22.97	35.994	19.43
		0.05	24.72	35.47	39.45	38.41	37.09	13.52	22.63	35.028	18.075
		0.07	23.87	33.83	37.74	36.7	35.5	12.46	22.55	33.528	17.505
		0.1	22.7	31.33	35.54	34.1	33.43	11.07	22.52	31.42	16.795
	waik-k	0.5	25.7	34.92	39.39	39.93	36.71	42.31	32.54	35.33	37.425
		1.1	23.97	33.65	37.94	36.95	34.78	41.12	31.93	33.458	36.525
		1.3	23.47	33.5	37.75	36.86	34.53	40.92	31.85	33.222	36.385
		1.5	22.64	32.61	37.19	36.76	34.13	40.62	31.58	32.666	36.1
		1.7	22.14	32.02	36.88	36.43	33.79	40.66	31.48	32.252	36.07
		1.9	21.64	31.53	36.49	36.21	33.29	40.41	31.22	31.832	35.815
		2.5	19.49	28.93	33.26	34.57	30.13	38.84	29.66	29.276	34.25
	SimulMER	0.2	26.5	37.01	41.28	39.46	38.53	43.38	33.44	36.556	38.41		25.7395	30.9998	23.8695		1.2	1.25964
		0.3	26.3	36.9	41.1	39.3	38.5	43.5	33.4	36.4	38.3		25.5	30.8	23.6		1.62162	1.54242
		0.4	26.1	36.8	40.8	39	38.4	43.2	33.2	36.2	38.2		25.4151	30.6595	23.4939		2.16216	1.79949
		0.5	25.9	36.6	40.7	38.8	38.2	43.1	33.1	36	38.1						2.7027	2.05656
		0.6	25.6	36.4	40.5	38.6	38	43.1	33	35.8	38		25.0816	30.2793	23.2064		3.24324	2.31362
		0.7	25.4	36	40.2	38.3	37.6	42.8	32.8	35.5	37.8		24.7771	30.117	22.9882		4.05405	2.82776
		0.8	24.88	35.39	39.65	37.64	37.05	42.3	32.21	34.922	37.255						5.61622	4.22879
Simul AL	data	offline	5.21	4.86	5.22	4.72	5.26	4.66	4.66	5.05	4.66
	Seamless	1	4.16	3.17	2.68	2.63	2.84	2.78	2.45	3.096	2.615		2.96	2.5	2.2
		0.9	3.64	2.63	2.15	2.2	2.33	2.34	2.05	2.59	2.195
		0.7	3.46	2.47	2.02	2.06	2.19	2.19	1.95	2.44	2.07		2.12	1.83	1.64
		0.5	3.32	2.36	1.9	1.95	2.08	2.1	1.87	2.322	1.985		2	1.7	1.6
		0.3	3.15	2.22	1.78	1.82	1.95	1.99	1.77	2.18	1.88		1.81	1.62	1.44
	DigSST复现	0.01	3.45	3.4	3.26	3.02	3.41	0.37	1.75	3.308	1.06
		0.03	2.72	2.85	2.63	2.51	2.83	-0.05	1.35	2.708	0.65
		0.05	2.37	2.51	2.31	2.25	2.5	-0.23	1.3	2.388	0.535
		0.07	2.21	2.25	2.11	2.06	2.28	-0.33	1.29	2.182	0.48
		0.1	2.04	1.98	1.92	1.84	2.06	-0.39	1.26	1.968	0.435
	wait-k	0.5	3.41	3.2	3.32	3.14	3.35	3.11	3.1	3.284	3.105
		1.1	2.63	2.43	2.48	2.43	2.52	2.51	2.48	2.498	2.495
		1.3	2.54	2.36	2.4	2.38	2.43	2.48	2.44	2.422	2.46
		1.5	2.32	2.15	2.16	2.2	2.19	2.34	2.29	2.204	2.315
		1.7	2.23	2.06	2.07	2.13	2.09	2.29	2.24	2.116	2.265
		1.9	2.14	1.99	1.99	2.08	2	2.25	2.2	2.04	2.225
		2.5	1.66	1.53	1.5	1.67	1.51	1.91	1.84	1.574	1.875
	Ours	0.2	3.11	2.87	2.34	2.13	2.44	3.24	2.9	2.578	3.07		2.437	3.15116	2.92872
		0.3	2.86	2.57	2.06	1.86	2.16	2.97	2.63	2.3	2.8		2.1	2.6	2.5
		0.4	2.68	2.36	1.87	1.69	1.97	2.76	2.41	2.11	2.59		1.88974	2.22871	2.19757
		0.5	2.53	2.19	1.72	1.55	1.81	2.59	2.08	1.96	2.34
		0.6	2.39	2.02	1.58	1.43	1.67	2.4	2.05	1.82	2.23		1.60849	1.74335	1.82097
		0.7	2.23	1.85	1.45	1.31	1.53	2.19	1.87	1.67	2.03		1.46977	1.53218	1.64947
		0.8	2.02	1.64	1.29	1.17	1.36	1.93	1.65	1.496	1.79

## Sheet: Fluers
SimulMER	offline		0.2		0.3		0.4			0.5			0.6			0.7			0.8
zh2en	21.6673	9.78239	21.0569	2.60375	20.981	2.25389	21.0172	2.03099		20.7977	1.89192		20.5801	1.76052		20.2695	1.6229		19.507	1.44436
zh2de	18.2583	9.78239	17.9982	2.93737	17.5728	2.5093	17.5747	2.27308		17.4008	2.10993		17.1989	1.96546		17.1509	1.80443		16.8666	1.60525
zh2es	17.5316	9.78239	17.6076	2.98187	17.3922	2.58857	17.3434	2.33044		17.147	2.14698		17.9971	1.9852		16.8096	1.83441		16.3844	1.61475
zh2fr	21.0015	9.78239	20.4433	2.89551	20.1407	2.50094	20.002	2.24834		19.6676	2.06892		19.6407	1.9281		19.4065	1.78265		19.0084	1.62999
zh2it	17.6822	9.78239	17.651	3.16001	17.5243	2.67347	17.2626	2.36275		17.0868	2.16121		16.9513	1.99811		16.8734	1.8413		16.5642	1.64622
en2zh	36.581	8.95764	36.3349	3.3551	36.0525	2.75204	35.7532	2.37798		35.481	2.09655		34.9326	1.86117		34.6277	1.64883		33.873	1.42181
en2de	32.7272	8.95773	32.7045	2.89431	32.3291	2.4274	32.1006	2.15085		31.4572	1.96091		31.2887	1.78283		30.9025	1.61291		30.3088	1.41924
en2es	23.9643	8.95773	23.6503	3.25853	23.5015	2.70509	23.5209	2.30808		23.4915	2.01304		23.3174	1.77793		23.4345	1.5459		23.1258	1.31402
en2fr	39.0671	8.95768	38.3834	2.99946	38.1775	2.4391	37.7952	2.07049		37.6577	1.82539		37.419	1.58478		37.2212	1.38326		36.7426	1.2059
en2it	24.6538	8.95768	24.4257	3.24838	24.503	2.62898	24.6276	2.23615		24.5296	1.92878		24.4386	1.71006		24.399	1.47		24.0548	1.26847
de2zh	30.9456	11.1208	30.5182	3.58769	29.9214	2.97251	29.322	2.57206		28.9042	2.27991		28.5373	2.03251		27.9604	1.78724		27.4835	1.53491
de2en	34.0382	11.1218	33.4501	2.88868	33.0988	2.48971	33.1099	2.25411		32.7365	2.08652		32.5492	1.92425		32.2727	1.75143		31.8369	1.54898
de2es	19.7585	11.1209	19.6098	3.31725	19.5796	2.85669	19.6656	2.58027		19.3601	2.373		19.3782	2.17951		19.2724	1.99777		19.1324	1.78111
de2fr	29.8609	11.1207	29.2573	3.27148	29.0832	2.81015	28.9303	2.53575		28.6542	2.31763		28.5266	2.12436		28.222	1.94001		27.9204	1.73531
de2it	21.2058	11.1207	20.8871	3.3603	20.4641	2.86936	20.5129	2.59419		20.2105	2.36354		20.1093	2.14718		19.9736	1.9571		19.8754	1.74189
es2zh	26.5743	10.7493	25.7626	3.31153	25.5691	2.79099	25.3624	2.44488		25.2629	2.22128		25.2981	2.02569		24.8506	1.83988		24.6915	1.65267
es2en	22.5242	10.7493	22.0216	2.12635	21.8654	1.83686	21.5787	1.65323		21.3833	1.51967		21.15	1.41392		20.7998	1.28914		20.4734	1.14393
es2de	18.7553	10.7493	18.0969	2.72805	17.8412	2.40373	17.73	2.19913		17.425	2.05017		17.2998	1.91426		17.2097	1.77742		17.1897	1.60112
es2fr	23.5592	10.7493	22.9833	2.50596	22.7119	2.06878	22.6037	1.81831		22.2181	1.65769		21.9931	1.50374		21.5396	1.36222		21.1696	1.19642
es2it	18.5207	10.7493	18.158	2.66228	17.7872	2.24448	17.5157	1.95343		17.4748	1.73285		17.5648	1.56499		17.411	1.4077		17.2948	1.23311
fr2zh	28.7702	9.04568	28.4425	3.16067	27.8717	2.56321	27.7935	2.2574		27.5859	2.0296		27.384	1.83067		26.943	1.64018		27.0169	1.46589
fr2en	30.439	9.04589	29.8641	2.13561	29.4776	1.77373	29.3412	1.57095		29.0516	1.42217		29.0215	1.29389		28.7222	1.17568		27.8941	1.02976
fr2de	22.1443	9.04572	21.2708	2.75164	21.3018	2.35602	21.1672	2.1025		21.0127	1.90822		20.7994	1.75787		20.4768	1.60689		20.2906	1.44083
fr2es	20.4255	9.04572	20.2646	2.60172	20.233	2.18198	20.0756	1.88846		19.9725	1.68311		19.8511	1.50207		19.8138	1.34306		19.6901	1.17109
fr2it	21.8027	9.04568	21.3371	2.65719	21.1689	2.17867	20.9291	1.89648		20.9101	1.68516		20.8676	1.5063		20.7055	1.33459		20.4712	1.15071
it2zh	28.8043	13.1587	28.0162	3.40358	27.8652	2.86757	27.5208	2.55284		27.299	2.36825		26.6732	2.16886		26.4727	1.94705		26.2579	1.79725
it2en	23.0436	13.1596	22.8046	2.43062	22.7049	2.13126	22.5285	1.93943		22.4223	1.78676		22.1072	1.64985		21.8211	1.50972		21.6132	1.34906
it2de	19.6351	13.1589	19.5808	3.07855	19.7556	2.73029	19.3899	2.51577		19.3994	2.35412		19.2606	2.20378		19.1995	2.06135		18.7986	1.84867
it2es	20.2747	13.1588	19.911	2.76891	19.8063	2.40423	19.7315	2.15778		19.6761	1.97468		19.5525	1.8238		19.6358	1.65059		19.354	1.45866
it2fr	25.9321	13.1592	25.594	2.77916	25.1656	2.33475	25.0115	2.05092		24.7236	1.88053		24.5053	1.70755		24.2493	1.55859		24.068	1.36376
X2EN	26.3425	10.7718	25.8395	2.437	25.6255	2.09709	25.5151	1.88974	#DIV/0!	25.2783	1.74141	#DIV/0!	25.0816	1.60849	#DIV/0!	24.7771	1.46977	#DIV/0!	24.2649	1.30322
EN2X	31.3987	8.95769	31.0998	3.15116	30.9127	2.59052	30.7595	2.22871	#DIV/0!	30.5234	1.96494	#DIV/0!	30.2793	1.74335	#DIV/0!	30.117	1.53218	#DIV/0!	29.621	1.32589
X2X	24.6716	10.4692	24.2695	2.92872	24.0482	2.47813	23.8939	2.19757	#DIV/0!	23.68	1.99662	#DIV/0!	23.5398	1.82097	#DIV/0!	23.2882	1.64947	#DIV/0!	22.9653	1.4605
	1.70673		3.30859		4.19027		4.80512		#DIV/0!	5.65739		#DIV/0!	6.21608		#DIV/0!	7.21828		#DIV/0!	8.50491
Seamless	offline		1		0.9		0.7			0.5			0.3
zh2en	22.0981	9.78358	21.541	3.95333	20.4398	3.07407	20.2801	2.83742		20.1468	2.62577		20.2271	2.35501
zh2de	8.04337	9.78358	6.76883	2.21819	6.23178	1.69715	6.03128	1.48842		6.0718	1.3664		5.89892	1.25056
zh2es	10.6106	9.78358	9.51451	2.1412	9.40279	1.67452	9.19303	1.54372		8.89721	1.44548		8.68857	1.32291
zh2fr	13.6807	9.78358	10.0844	2.27843	9.28132	1.95106	9.14955	1.81976		9.14435	1.74433		9.02034	1.65603
zh2it	9.85249	9.78358	8.21801	2.05776	8.13346	1.58345	8.01002	1.3959		7.8809	1.28521		7.79077	1.12835
en2zh	31.7519	8.95804	32.0707	2.62675	31.8697	2.0544	31.9594	1.9223		31.6263	1.81883		31.4873	1.72618
en2de	30.198	8.95777	28.6154	2.68966	28.3472	2.12811	28.3643	1.97685		28.4191	1.8608		27.7836	1.72855
en2es	22.0564	8.95784	22.8421	2.42906	22.609	1.94686	22.738	1.79968		22.7253	1.70606		22.6917	1.58348
en2fr	37.0069	8.95774	37.1458	2.33128	37.1118	1.84241	37.2234	1.69705		37.2068	1.61816		36.7526	1.51048
en2it	23.5027	8.95779	23.585	2.40382	23.5107	1.92326	23.4886	1.76433		23.1304	1.65677		23.3273	1.53099
de2zh	19.4397	11.3874	17.8188	2.22628	16.8776	1.87947	16.7847	1.75443		16.3647	1.70977		16.124	1.63885
de2en	35.3556	11.3874	34.0654	2.91241	32.7663	2.25512	32.1942	2.04113		31.8132	1.91244		31.3305	1.67867
de2es	13.0317	11.3873	13.6857	2.03055	13.8169	1.64408	13.5166	1.50186		13.6603	1.40407		13.4721	1.31845
de2fr	16.9237	11.3873	16.4267	1.98326	15.8596	1.64978	16.0293	1.54836		16.0071	1.46702		15.9699	1.34109
de2it	11.8939	11.3873	12.1932	1.7961	12.512	1.33176	12.2413	1.20563		12.2962	1.0882		11.9739	0.949524
es2zh	17.2975	10.7497	15.8464	1.8771	14.968	1.57115	14.8065	1.4916		14.6991	1.41736		14.4078	1.35181
es2en	24.333	10.7497	24.1452	2.51996	23.9218	1.96389	23.6308	1.8266		23.5569	1.73477		23.3902	1.61361
es2de	7.07633	10.7497	9.46855	2.02627	9.4062	1.68187	9.44564	1.56551		9.2617	1.49323		9.19668	1.38138
es2fr	11.7557	10.7497	12.9743	1.49705	12.9675	1.24874	12.9407	1.18115		13.0128	1.12235		13.0303	1.06229
es2it	10.2313	10.7497	10.9457	1.5049	11.2259	1.23075	11.2872	1.1642		11.3506	1.09977		11.3039	1.03825
fr2zh	19.5231	9.07244	18.0707	1.95788	17.4557	1.69016	17.2783	1.61472		17.0203	1.55987		16.9309	1.50464
fr2en	32.8155	9.07237	32.5165	2.49167	31.6257	1.96438	31.1404	1.84463		30.6577	1.75564		30.1482	1.63482
fr2de	9.28396	9.07238	11.9871	2.11818	12.0392	1.74694	12.2153	1.66997		12.0732	1.55683		11.6481	1.45564
fr2es	12.5887	9.0724	14.8344	1.63751	14.8048	1.38185	14.7255	1.29622		14.7405	1.23964		14.7865	1.17344
fr2it	13.6528	9.07238	14.276	1.67364	14.1494	1.36876	14.1118	1.29389		14.2784	1.2429		14.1702	1.12161
it2zh	16.8088	13.3609	15.2614	2.11066	14.5163	1.75055	13.8375	1.66069		13.8839	1.60724		13.4298	1.51382
it2en	25.2665	13.3609	23.942	2.92192	23.5114	2.23548	23.0388	2.04934		22.624	1.91133		22.0935	1.75091
it2de	9.48788	13.3609	9.36653	2.19723	9.38721	1.8225	9.34216	1.72003		9.2387	1.6237		9.25614	1.52435
it2es	12.8435	13.3609	13.4277	1.73013	13.6252	1.4346	13.817	1.34453		13.7092	1.29549		13.6209	1.21538
it2fr	15.4703	13.3609	15.3429	1.70277	15.4327	1.3972	15.3012	1.32141		15.3323	1.25646		15.3726	1.18388
X2EN	27.9737	10.8708	27.242	2.95986	26.453	2.29859	26.0569	2.11982	#DIV/0!	25.7597	1.98799	#DIV/0!	25.4379	1.8066	#DIV/0!	#DIV/0!	#DIV/0!	#DIV/0!	#DIV/0!	#DIV/0!	#DIV/0!	#DIV/0!	#DIV/0!	#DIV/0!	#DIV/0!	#DIV/0!	#DIV/0!
EN2X	28.9032	8.95784	28.8518	2.49611	28.6897	1.97901	28.7548	1.83204	#DIV/0!	28.6216	1.73212	#DIV/0!	28.4085	1.61594	#DIV/0!	#DIV/0!	#DIV/0!	#DIV/0!	#DIV/0!	#DIV/0!	#DIV/0!	#DIV/0!	#DIV/0!	#DIV/0!	#DIV/0!	#DIV/0!	#DIV/0!
X2X	18.1294	10.552	17.8994	2.2015	17.5936	1.77081	17.4708	1.64471	#DIV/0!	17.361	1.5542	#DIV/0!	17.1775	1.4415	#DIV/0!	#DIV/0!	#DIV/0!	#DIV/0!	#DIV/0!	#DIV/0!	#DIV/0!	#DIV/0!	#DIV/0!	#DIV/0!	#DIV/0!	#DIV/0!	#DIV/0!
	7.50327		8.67676		10.2369		10.8635		#DIV/0!	11.4235		#DIV/0!	12.3598
DigSST	0.01		0.03		0.05		0.07			0.1
zh2en	21.2918	6.11166	20.866	4.61997	20.565	3.88067	19.9932	3.48017		18.7648	3.22688
zh2de	14.1969	3.30793	12.7807	2.99861	12.7232	3.01654	12.6396	2.9978		12.5341	2.88471
zh2es	13.7241	3.83835	12.7129	3.0759	12.8894	2.62826	12.652	2.54849		12.4382	2.48446
zh2fr	19.0127	3.56892	18.1466	2.76277	17.9246	2.60167	18.0377	2.60733		17.8255	2.62758
zh2it	13.554	3.08543	13.2342	2.56467	13.1359	2.62192	13.0134	2.63792		12.7731	2.64069
en2zh	21.8045	0.440526	15.4526	-0.483879	12.6246	-0.893292	11.5814	-1.04886		10.3778	-1.21325
en2de	29.1116	3.30938	28.2752	3.11002	28.0008	3.0438	27.9309	3.04026		27.6856	2.97801
en2es	21.8594	3.25751	21.191	2.74682	20.8328	2.63969	20.5102	2.54289		20.4775	2.48391
en2fr	35.3259	3.29949	34.5392	2.75335	33.7758	2.58935	33.336	2.4009		33.0646	2.39493
en2it	22.944	2.9975	22.1336	2.679	21.7715	2.5843	21.6727	2.52994		21.5373	2.4507
de2zh	17.6474	0.43319	13.6202	-0.400255	11.8808	-0.716729	11.6364	-0.824339		11.5622	-0.896125
de2en	33.608	7.07899	33.4549	5.76672	33.1321	4.98265	32.4626	4.52918		30.7166	4.12755
de2es	17.8697	4.24558	17.0167	3.41492	16.8824	3.15532	16.6665	3.02821		16.4988	2.9731
de2fr	26.461	4.23835	25.7423	3.30094	25.3709	2.94499	25.2272	2.89476		25.0641	2.87472
de2it	18.5233	3.74767	18.1235	3.21696	18.1787	3.10447	18.1899	3.07697		18.1354	2.971
es2zh	19.3915	1.48902	16.3299	0.771267	15.3268	0.590848	14.4935	0.532566		13.8605	0.458359
es2en	22.1685	6.67961	21.8893	5.40967	21.7538	4.79623	21.4022	4.31058		20.6857	4.00547
es2de	14.8363	3.9957	14.6219	3.43519	14.2837	3.36508	14.3148	3.40879		14.2686	3.39631
es2fr	21.6035	4.01229	20.6204	3.0197	20.6666	2.37917	20.6158	2.2996		20.4566	2.44396
es2it	16.5173	3.52935	16.196	2.92107	16.1105	2.78911	16.0795	2.79846		16.0273	2.7373
fr2zh	17.9154	0.837041	15.8723	0.350385	15.0211	0.169408	14.6034	0.0349408		14.151	-0.0678994
fr2en	30.3599	5.77962	29.9917	4.68774	29.5389	4.07352	28.9883	3.68824		27.9244	3.4008
fr2de	18.4259	3.29672	18.2742	2.90009	18.0537	2.8274	18.0429	2.84686		17.9593	2.75893
fr2es	18.4541	3.27482	18.0801	2.67231	18.4252	2.41286	18.3527	2.34291		18.2129	2.28624
fr2it	19.5787	2.79865	19.5569	2.5018	19.4991	2.40547	19.3084	2.3632		19.1638	2.35602
it2zh	20.0138	1.52697	17.7067	0.834636	16.4585	0.631503	16.0189	0.543896		15.2074	0.398775
it2en	23.2346	7.78458	22.8719	6.24124	22.377	5.47172	21.984	5.00023		21.0815	4.60427
it2de	16.7427	5.0625	15.9234	4.30246	15.6891	4.23466	15.7035	4.28655		15.5031	4.09799
it2es	18.7339	4.85842	17.3784	3.75028	17.1127	3.63312	17.1003	3.56323		17.1486	3.37294
it2fr	23.7075	4.5704	22.5636	3.47613	22.0068	3.06183	21.9143	2.88336		21.8387	2.97186
X2EN	26.1326	6.68689	25.8148	5.34507	25.4734	4.64096	24.9661	4.20168	#DIV/0!	23.8346	3.87299	#DIV/0!	#DIV/0!	#DIV/0!	#DIV/0!	#DIV/0!	#DIV/0!	#DIV/0!	#DIV/0!	#DIV/0!	#DIV/0!	#DIV/0!	#DIV/0!	#DIV/0!	#DIV/0!	#DIV/0!	#DIV/0!
EN2X	26.2091	2.66088	24.3183	2.16106	23.4011	1.99277	23.0062	1.89303	#DIV/0!	22.6286	1.81886	#DIV/0!	#DIV/0!	#DIV/0!	#DIV/0!	#DIV/0!	#DIV/0!	#DIV/0!	#DIV/0!	#DIV/0!	#DIV/0!	#DIV/0!	#DIV/0!	#DIV/0!	#DIV/0!	#DIV/0!	#DIV/0!
X2X	20.9539	3.74854	19.8389	2.98002	19.4004	2.70085	19.1491	2.57817	#DIV/0!	18.7648	2.47434	#DIV/0!	#DIV/0!	#DIV/0!	#DIV/0!	#DIV/0!	#DIV/0!	#DIV/0!	#DIV/0!	#DIV/0!	#DIV/0!	#DIV/0!	#DIV/0!	#DIV/0!	#DIV/0!	#DIV/0!	#DIV/0!
WaitK	0.5		1.1		1.5		1.9			2.5
zh2en	21.4461	4.80735	20.586	3.55956	20.382	2.86972	19.3737	2.38413		16.7887	1.58129
zh2de	16.3337	5.01704	15.6729	4.02433	15.4285	3.51387	14.9529	3.16302		13.8098	2.45146
zh2es	15.1758	5.00429	15.0485	4.00237	14.9071	3.47733	14.709	3.11281		13.7821	2.38111
zh2fr	20.4286	5.03554	19.9949	4.0733	19.4475	3.57395	19.3232	3.24145		18.5794	2.5084
zh2it	15.3374	5.05322	14.7188	4.10714	14.4835	3.61923	14.1868	3.27839		13.6229	2.61309
en2zh	34.2563	5.0902	33.5848	4.09986	33.4362	3.56635	32.8165	3.1849		31.6326	2.44532
en2de	30.6112	5.0519	29.7171	4.02046	29.412	3.49876	29.226	3.09787		28.4454	2.35777
en2es	22.7284	5.03747	22.2181	4.00074	22.0157	3.4377	21.787	3.03771		20.9272	2.2628
en2fr	37.0364	5.0706	36.6052	4.07471	36.3933	3.53977	36.1436	3.15312		35.1986	2.447
en2it	23.2157	5.09046	22.6046	4.11575	22.6697	3.60014	22.4702	3.24896		21.989	2.50383
de2zh	29.5374	5.60697	28.5742	4.27683	27.6775	3.52565	26.94	2.98751		25.3052	2.09648
de2en	32.5675	5.20135	30.7148	3.39593	29.0281	2.40334	27.4713	1.78927		24.3441	1.05654
de2es	18.9755	5.53912	18.2647	4.11976	17.7196	3.29874	17.2744	2.67449		15.7283	1.8106
de2fr	28.6362	5.59245	27.2331	4.24855	26.7024	3.47972	25.9115	2.909		23.9302	1.98253
de2it	20.1695	5.60951	19.1912	4.29052	18.6219	3.52379	18.4384	2.97537		16.5964	2.08671
es2zh	26.1345	5.63669	25.405	4.43784	25.1893	3.79741	25.0337	3.3168		23.2014	2.47751
es2en	21.2794	5.32586	20.6056	3.74167	20.5522	2.79927	19.826	2.12988		16.8408	1.3098
es2de	16.192	5.62026	15.7802	4.40192	15.583	3.69893	15.5134	3.17382		14.4067	2.27785
es2fr	22.933	5.63691	22.2349	4.43972	22.2271	3.76029	21.9648	3.2503		21.1777	2.33065
es2it	18.1823	5.65727	17.6291	4.49057	17.3805	3.82978	17.4381	3.33354		16.9999	2.41579
fr2zh	28.2319	5.05948	27.7258	4.12112	26.974	3.61858	26.8871	3.29756		26.4	2.61377
fr2en	29.0309	4.82562	28.5328	3.61317	28.2915	2.92296	27.7253	2.44214		25.6049	1.62158
fr2de	20.98	5.0259	20.3128	4.06522	20.1425	3.54805	20.0472	3.18717		19.7991	2.45926
fr2es	19.5071	5.0076	19.3167	4.02127	19.22	3.49038	19.1197	3.12484		18.564	2.37862
fr2it	20.7724	5.05361	20.1724	4.12493	20.0758	3.6393	19.8847	3.30512		19.6436	2.6143
it2zh	27.4604	6.3284	26.8314	4.56286	25.8147	3.63006	24.3889	2.99163		22.0836	2.09894
it2en	21.848	5.7201	20.4613	3.2698	18.7801	2.18903	16.6872	1.56135		13.9098	0.988682
it2de	17.4623	6.26913	17.1619	4.40703	16.4484	3.36409	15.1495	2.69975		12.7366	1.79874
it2es	18.8998	6.21257	18.0296	4.26517	17.5974	3.15362	16.7143	2.46274		15.2626	1.53949
it2fr	24.0179	6.29178	23.0436	4.46421	22.4222	3.36168	21.3776	2.68177		19.138	1.76932
X2EN	25.2344	5.17606	24.1801	3.51603	23.4068	2.63687	22.2167	2.06135	#DIV/0!	19.4977	1.31158	#DIV/0!	#DIV/0!	#DIV/0!	#DIV/0!	#DIV/0!	#DIV/0!	#DIV/0!	#DIV/0!	#DIV/0!	#DIV/0!	#DIV/0!	#DIV/0!	#DIV/0!	#DIV/0!	#DIV/0!	#DIV/0!
EN2X	29.5696	5.06813	28.946	4.06231	28.7854	3.52854	28.4887	3.14451	#DIV/0!	27.6385	2.40334	#DIV/0!	#DIV/0!	#DIV/0!	#DIV/0!	#DIV/0!	#DIV/0!	#DIV/0!	#DIV/0!	#DIV/0!	#DIV/0!	#DIV/0!	#DIV/0!	#DIV/0!	#DIV/0!	#DIV/0!	#DIV/0!
X2X	23.3129	5.38262	22.5991	4.09454	22.1675	3.39105	21.6261	2.90655	#DIV/0!	20.2149	2.10931	#DIV/0!	#DIV/0!	#DIV/0!	#DIV/0!	#DIV/0!	#DIV/0!	#DIV/0!	#DIV/0!	#DIV/0!	#DIV/0!	#DIV/0!	#DIV/0!	#DIV/0!	#DIV/0!	#DIV/0!	#DIV/0!

## Sheet: TTS
	LibirSpeech				SeedTTS_zh				CoVoST2_zh-en		CoVoST2_en-zh
	WER	SIM	AL		WER	SIM	AL		WER	SIM	WER	SIM
CozyVoice2	2.443	0.658	22.329		1.618	0.757	23.139
CozyVoice2-S	5.308	0.651	18.5031	8.3771	7.979	0.76	20.9107	8.404	19.94	0.388	7.74	0.352
Seamless										0.292	18.86	0.301
SimulMER-TTS	2.538	0.661	1.18691		1.9	0.755	0.53923		12.26	0.391	4.51	0.405
												19.94
	chunk=2	2.438	0.661	2.137		1.848	0.755	1.5635				12.26		offline
	chunk=4	2.539	0.661	3.7511		1.979	0.754	3.1136						dual stream
														chunk=1
CoVoST2	SimulMER-S2S		-	0.395	-
	seamless			0.298
S2ST		en-zh s2s	ours		zh-en s2s	ours			en-zh s2t	ours		zh-en s2t	ours
			41.32			24.46
	0.2	3.27	40.85	0.389	3.35	24.47	0.405		3.24	43.38		3.11	26.5		7.66038		5.83218
	0.3	3	40.66		3.09	24.65			2.97	43.5		2.86	26.3		6.27376		6.52874
	0.4	2.8	40.56		2.89	24.2			2.76	43.2		2.68	26.1		7.27969		6.11111
	0.5	2.64	40.39		2.73	23.99			2.59	43.1		2.53	25.9		7.37452		6.2877
	0.6	2.43	40.4		2.58	23.6			2.4	43.1		2.39	25.6		7.8125		6.2645
	0.7	2.23	40.3		2.46	23.18			2.19	42.8		2.23	25.4		8.74016		5.84112
	0.8	1.97	39.69	0.3906	2.26	22.59	0.41		1.93	42.3		2.02	24.88		9.20418		6.17021
		en-zh s2s	cosyvoice		zh-en s2s	cosyvoice
	0.2	3.74	39.92		4.13	22.87
	0.3	3.51	39.43		3.9	22.87
	0.4	3.35	39.44		3.75	23.14
	0.5	3.21	39.82		3.61	22.54
	0.6	3.04	39.11		3.49	22.36
	0.7	2.89	39.14		3.36	21.59
	0.8	2.69	38.59		3.2	21.51
		en-zh s2s	seamless		zh-en s2s	seamless			en-zh s2t	seamless		zh-en s2t	seamless
	0.9	2.34	30.27	0.293	3.64	17.98	0.303		2.34	37.91		3.64	20.2		10.9901		20.153
	0.7	2.19	30.01	0.292	3.46	17.93	0.301		2.19	37.54		3.46	20.13		10.929		20.0586
	0.5	2.1	29.83		3.32	17.55			2.1	37.3		3.32	19.8		11.3636		20.0268
	0.3	1.99	29.81		3.15	17.49	0.301		1.99	37.3		3.15	19.5		10.3077		20.0804
	1	2.78			4.16				2.78	38.6		4.16	20.9

## Sheet: ablation
		ns=0			ns=1			ns=2			ns=1 w/o norm			ns=1 w/o trunc			ns=1 w/o full
0		45.9836	4.65965		45.9812	4.65962		45.9539	4.65962		46.0005	4.65975		45.8406	4.65963		44.8383	4.65921
0.2		45.918	3.77057		45.884	3.50292		45.5796	2.91716		45.9541	4.04402		45.9304	3.90743		44.9625	3.87436
0.3		45.9749	3.43521		45.8166	3.25489		45.3797	2.84084		45.9452	3.76676		45.9768	3.66247		44.9709	3.61971
0.4		45.8288	3.16748		45.7293	3.05706		45.346	2.78491		45.9138	3.50721		45.9582	3.42658		44.8165	3.38359
0.5		45.5691	2.88193		45.5448	2.85688		45.3333	2.71992		45.8604	3.23787		45.878	3.19621		44.6363	3.14841
0.6		45.2876	2.58358		45.3587	2.67064		45.3062	2.67064		45.5699	3.0064		45.4874	2.93114		44.46	2.90115
0.7		44.5435	2.19679		45.1928	2.45376		45.2322	2.61607		45.2459	2.75624		45.3122	2.61307		44.221	2.59992
0.8		42.7555	1.63168		44.9249	2.25566		45.17	2.55251		44.8957	2.4423		44.7782	2.18844		43.7647	2.21906
		10	4
